# Supplementary material for: Consumer perceptions of antimicrobial use in animal husbandry: A scoping review
Source: PubMed Central journal article supplement (PMC8654221; doi:10.1371/journal.pone.0261010), 2021-12-08

# PLOS ONE

## Consumer perceptions of antimicrobial use in animal agriculture in the United States, Canada, and the European Union: A scoping review --Manuscript Draft--

|                                |                                                                                                                                                                                                                                                                                                                                                                                                                                                                                                                                                                                                                                                                                                                                                                                                                                                                                                                                                                                                                                                                                                                                                                                                                                                                                                                                                                                                                                                                                                                                                                                                                                                                                                                                                                                                                                                                                                                                                                                                                                                                                                                              |
|--------------------------------|------------------------------------------------------------------------------------------------------------------------------------------------------------------------------------------------------------------------------------------------------------------------------------------------------------------------------------------------------------------------------------------------------------------------------------------------------------------------------------------------------------------------------------------------------------------------------------------------------------------------------------------------------------------------------------------------------------------------------------------------------------------------------------------------------------------------------------------------------------------------------------------------------------------------------------------------------------------------------------------------------------------------------------------------------------------------------------------------------------------------------------------------------------------------------------------------------------------------------------------------------------------------------------------------------------------------------------------------------------------------------------------------------------------------------------------------------------------------------------------------------------------------------------------------------------------------------------------------------------------------------------------------------------------------------------------------------------------------------------------------------------------------------------------------------------------------------------------------------------------------------------------------------------------------------------------------------------------------------------------------------------------------------------------------------------------------------------------------------------------------------|
| <b>Manuscript Number:</b>      | PONE-D-21-21650                                                                                                                                                                                                                                                                                                                                                                                                                                                                                                                                                                                                                                                                                                                                                                                                                                                                                                                                                                                                                                                                                                                                                                                                                                                                                                                                                                                                                                                                                                                                                                                                                                                                                                                                                                                                                                                                                                                                                                                                                                                                                                              |
| <b>Article Type:</b>           | Research Article                                                                                                                                                                                                                                                                                                                                                                                                                                                                                                                                                                                                                                                                                                                                                                                                                                                                                                                                                                                                                                                                                                                                                                                                                                                                                                                                                                                                                                                                                                                                                                                                                                                                                                                                                                                                                                                                                                                                                                                                                                                                                                             |
| <b>Full Title:</b>             | Consumer perceptions of antimicrobial use in animal agriculture in the United States, Canada, and the European Union: A scoping review                                                                                                                                                                                                                                                                                                                                                                                                                                                                                                                                                                                                                                                                                                                                                                                                                                                                                                                                                                                                                                                                                                                                                                                                                                                                                                                                                                                                                                                                                                                                                                                                                                                                                                                                                                                                                                                                                                                                                                                       |
| <b>Short Title:</b>            | A Scoping review of consumer perceptions of antimicrobial use in animal agriculture                                                                                                                                                                                                                                                                                                                                                                                                                                                                                                                                                                                                                                                                                                                                                                                                                                                                                                                                                                                                                                                                                                                                                                                                                                                                                                                                                                                                                                                                                                                                                                                                                                                                                                                                                                                                                                                                                                                                                                                                                                          |
| <b>Corresponding Author:</b>   | David Lansing<br>University of Maryland Baltimore County<br>Baltimore, MD UNITED STATES                                                                                                                                                                                                                                                                                                                                                                                                                                                                                                                                                                                                                                                                                                                                                                                                                                                                                                                                                                                                                                                                                                                                                                                                                                                                                                                                                                                                                                                                                                                                                                                                                                                                                                                                                                                                                                                                                                                                                                                                                                      |
| <b>Keywords:</b>               | Economics; Agricultural Economics; Environmental Economics; Bioeconomics; health economics; Information economics; Microeconomics; Household economics; Economic analysis; Cost-benefit analysis; Cost-effectiveness analysis; Risk-benefit analysis; Foodborne diseases                                                                                                                                                                                                                                                                                                                                                                                                                                                                                                                                                                                                                                                                                                                                                                                                                                                                                                                                                                                                                                                                                                                                                                                                                                                                                                                                                                                                                                                                                                                                                                                                                                                                                                                                                                                                                                                     |
| <b>Abstract:</b>               | Antimicrobial use in animal agriculture is often perceived to play a role in the emerging threat of antimicrobial resistance. Increased consumer awareness of this issue places pressure on animal agriculture to adopt policies to reduce or eliminate antimicrobial use. We use a scoping review methodology to assess research on consumer perceptions of antimicrobial drugs in meat products in the United States, Canada, or the European Union. Evaluating peer reviewed and grey literature, we included studies for assessment if they met these topical and geographic requirements, involved primary data collection, and were originally published in English. Our screening process identified 125 relevant studies. Three reviewers jointly developed a data charting form and independently charted the contents of the studies. Of the 106 studies that directly measured consumer concern, 77.4% found that consumers were concerned about antimicrobial use in meat production. A minority of studies (29.6% of all studies) queried why consumers hold these views. These studies found human health and animal welfare were the main reasons for concern. Antimicrobial resistance rarely registered as an explicit reason for concern. A smaller group of studies (23.2%) measured the personal characteristics of consumers that expressed concern about antimicrobials. The most common and consistent features of these consumers were gender, age, income, and education. Overall, studies tended to be dominated by either willingness-to-pay studies or likert scale questionnaires (73.6% of all studies). The popularity of these methods may have contributed to the relative lack of studies that characterized worried consumer demographics or reasons for their perspectives. We recommend more qualitative research into consumer views on this topic, which may better elucidate consumer decision-making and mentality. In addition, more research into the difference between what consumers claim is of concern and their ultimate purchasing decisions would be especially valuable. |
| <b>Order of Authors:</b>       | Jaime R Barrett<br>Gabriel K Innes<br>Kelly A Johnson<br>Guillaume Lhermie<br>Renata Ivanek<br>Amelia Greiner Safi<br>David Lansing, Ph.D                                                                                                                                                                                                                                                                                                                                                                                                                                                                                                                                                                                                                                                                                                                                                                                                                                                                                                                                                                                                                                                                                                                                                                                                                                                                                                                                                                                                                                                                                                                                                                                                                                                                                                                                                                                                                                                                                                                                                                                    |
| <b>Additional Information:</b> |                                                                                                                                                                                                                                                                                                                                                                                                                                                                                                                                                                                                                                                                                                                                                                                                                                                                                                                                                                                                                                                                                                                                                                                                                                                                                                                                                                                                                                                                                                                                                                                                                                                                                                                                                                                                                                                                                                                                                                                                                                                                                                                              |
| <b>Question</b>                | <b>Response</b>                                                                                                                                                                                                                                                                                                                                                                                                                                                                                                                                                                                                                                                                                                                                                                                                                                                                                                                                                                                                                                                                                                                                                                                                                                                                                                                                                                                                                                                                                                                                                                                                                                                                                                                                                                                                                                                                                                                                                                                                                                                                                                              |
| <b>Financial Disclosure</b>    | JRB, GKI, GL, RI, AGS, DL received funds from the United States Department of                                                                                                                                                                                                                                                                                                                                                                                                                                                                                                                                                                                                                                                                                                                                                                                                                                                                                                                                                                                                                                                                                                                                                                                                                                                                                                                                                                                                                                                                                                                                                                                                                                                                                                                                                                                                                                                                                                                                                                                                                                                |

Enter a financial disclosure statement that describes the sources of funding for the work included in this submission. Review the [submission guidelines](#) for detailed requirements. View published research articles from [PLOS ONE](#) for specific examples.

This statement is required for submission and **will appear in the published article** if the submission is accepted. Please make sure it is accurate.

#### Unfunded studies

Enter: *The author(s) received no specific funding for this work.*

#### Funded studies

Enter a statement with the following details:

- Initials of the authors who received each award
- Grant numbers awarded to each author
- The full name of each funder
- URL of each funder website
- Did the sponsors or funders play any role in the study design, data collection and analysis, decision to publish, or preparation of the manuscript?
- **NO** - Include this sentence at the end of your statement: *The funders had no role in study design, data collection and analysis, decision to publish, or preparation of the manuscript.*
- **YES** - Specify the role(s) played.

\* typeset

#### Competing Interests

Use the instructions below to enter a competing interest statement for this submission. On behalf of all authors, disclose any [competing interests](#) that could be perceived to bias this work—acknowledging all financial support and any other relevant financial or non-financial competing interests.

This statement is **required** for submission and **will appear in the published article** if

Agriculture, National Institute for Food and Agriculture grant # 2019-67017-29114.

JRB, DL received funds from USDA-NIFA grant #2018-68003-27467  
<https://nifa.usda.gov/>

The funders had no role in the study design, data collection and analysis, decision to publish, or preparation of the manuscript.

the submission is accepted. Please make sure it is accurate and that any funding sources listed in your Funding Information later in the submission form are also declared in your Financial Disclosure statement.

View published research articles from [PLOS ONE](#) for specific examples.

**NO authors have competing interests**

Enter: *The authors have declared that no competing interests exist.*

**Authors with competing interests**

Enter competing interest details beginning with this statement:

*I have read the journal's policy and the authors of this manuscript have the following competing interests: [insert competing interests here]*

\* typeset

**Ethics Statement**

N/A

Enter an ethics statement for this submission. This statement is required if the study involved:

- Human participants
- Human specimens or tissue
- Vertebrate animals or cephalopods
- Vertebrate embryos or tissues
- Field research

Write "N/A" if the submission does not require an ethics statement.

General guidance is provided below. Consult the [submission guidelines](#) for detailed instructions. **Make sure that all information entered here is included in the Methods section of the manuscript.**

**Format for specific study types**

**Human Subject Research (involving human participants and/or tissue)**

- Give the name of the institutional review board or ethics committee that approved the study
- Include the approval number and/or a statement indicating approval of this research
- Indicate the form of consent obtained (written/oral) or the reason that consent was not obtained (e.g. the data were analyzed anonymously)

**Animal Research (involving vertebrate animals, embryos or tissues)**

- Provide the name of the Institutional Animal Care and Use Committee (IACUC) or other relevant ethics board that reviewed the study protocol, and indicate whether they approved this research or granted a formal waiver of ethical approval
- Include an approval number if one was obtained
- If the study involved *non-human primates*, add *additional details* about animal welfare and steps taken to ameliorate suffering
- If anesthesia, euthanasia, or any kind of animal sacrifice is part of the study, include briefly which substances and/or methods were applied

**Field Research**

Include the following details if this study involves the collection of plant, animal, or other materials from a natural setting:

- Field permit number
- Name of the institution or relevant body that granted permission

**Data Availability**

Authors are required to make all data underlying the findings described fully available, without restriction, and from the time of publication. PLOS allows rare exceptions to address legal and ethical concerns. See the [PLOS Data Policy](#) and [FAQ](#) for detailed information.

Yes - all data are fully available without restriction

A Data Availability Statement describing where the data can be found is required at submission. Your answers to this question constitute the Data Availability Statement and **will be published in the article**, if accepted.

**Important:** Stating 'data available on request from the author' is not sufficient. If your data are only available upon request, select 'No' for the first question and explain your exceptional situation in the text box.

Do the authors confirm that all data underlying the findings described in their manuscript are fully available without restriction?

**Describe where the data may be found in full sentences. If you are copying our sample text, replace any instances of XXX with the appropriate details.**

- If the data are **held or will be held in a public repository**, include URLs, accession numbers or DOIs. If this information will only be available after acceptance, indicate this by ticking the box below. For example: *All XXX files are available from the XXX database (accession number(s) XXX, XXX).*
- If the data are all contained **within the manuscript and/or Supporting Information files**, enter the following: *All relevant data are within the manuscript and its Supporting Information files.*
- If neither of these applies but you are able to provide **details of access elsewhere**, with or without limitations, please do so. For example:

*Data cannot be shared publicly because of [XXX]. Data are available from the XXX Institutional Data Access / Ethics Committee (contact via XXX) for researchers who meet the criteria for access to confidential data.*

*The data underlying the results presented in the study are available from (include the name of the third party*

The charting data that is the basis of our analysis can be found at: <https://osf.io/27pyw/>

*and contact information or URL).*

- This text is appropriate if the data are owned by a third party and authors do not have permission to share the data.

\* typeset

Additional data availability information:

1       **Consumer perceptions of antimicrobial use in animal agriculture in the United States,**  
2                                   **Canada, and the European Union: A scoping review**

3  
4   **Authors**

5  
6   Jaime R. Barrett

7   Contributed equally to this work with Gabriel K. Innes

8   **Roles:** Conceptualization, Data Curation, Formal Analysis, Investigation, Writing-original,  
9   Writing-review and editing

10   **Affiliation:** Department of Geography and Environmental Systems, University of Maryland  
11   Baltimore County, Baltimore, MD, USA<sup>†</sup>

12  
13   Gabriel K. Innes

14   Contributed equally to this work with Jaime R. Barrett

15   **Roles:** Conceptualization, Data Curation, Formal Analysis, Investigation, Writing-original,  
16   Writing-review and editing

17   **Affiliation:** Department of Biostatistics and Epidemiology, Rutgers School of Public Health,  
18   Piscataway, NJ, USA

19  
20   Kelly A. Johnson

21   **Roles:** Data curation, Investigation, Methodology, Project Administration, Writing-original,  
22   Writing-review and editing

23   **Affiliation:** Flower-Sprecher Veterinary Library, College of Veterinary Medicine, Cornell  
24   University, Ithaca, NY, USA

25  
26   Guillaume Lhermie

27   **Roles:** Conceptualization, Formal Analysis, Investigation, Writing – original, Writing – review  
28   and editing

29   **Affiliation:** Department of Production Animal Health, University of Calgary, Calgary, T2N 4Z6,  
30   Canada; CIRAD, UMR ASTRE, Montpellier, France, ASTRE, CIRAD, INRAE, Univ  
31   Montpellier, Montpellier, Université de Toulouse, ENVT, 31300 Toulouse, France

32  
33   Renata Ivanek

34   **Roles:** Conceptualization, Investigation, Writing – review and editing

35   **Affiliation:** Department of Population Medicine and Diagnostic Sciences, College of Veterinary  
36   Medicine, Cornell University, Ithaca, NY, USA

37  
38   Amelia Greiner Safi

39   **Roles:** Conceptualization, Investigation, Writing – review & editing

40 **Affiliation:** Department of Public and Planetary Health, College of Veterinary Medicine &  
41 Department of Communication, College of Agriculture and Life Sciences Cornell University,  
42 Ithaca, NY, USA

43

44 David Lansing

45 **Roles:** Conceptualization, Data Curation, Investigation, Formal analysis, Project Administration,  
46 Writing – original draft, Writing – review & editing

47 **Affiliation:** Department of Geography and Environmental Systems, University of Maryland  
48 Baltimore County, Baltimore, MD, USA

49

50

51



52  
53  
54  
55  
56  
57  
58  
59  
60  
61  
62  
63  
64  
65  
66  
67  
68  
69  
70  
71  
72  
73  
74

**ABSTRACT:**

Antimicrobial use in animal agriculture is often perceived to play a role in the emerging threat of antimicrobial resistance. Increased consumer awareness of this issue places pressure on animal agriculture to adopt policies to reduce or eliminate antimicrobial use. We use a scoping review methodology to assess research on consumer perceptions of antimicrobial drugs in meat products in the United States, Canada, or the European Union. Evaluating peer reviewed and grey literature, we included studies for assessment if they met these topical and geographic requirements, involved primary data collection, and were originally published in English. Our screening process identified 125 relevant studies. Three reviewers jointly developed a data charting form and independently charted the contents of the studies. Of the 106 studies that directly measured consumer concern, 77.4% found that consumers were concerned about antimicrobial use in meat production. A minority of studies (29.6% of all studies) queried why consumers hold these views. These studies found human health and animal welfare were the main reasons for concern. Antimicrobial resistance rarely registered as an explicit reason for concern. A smaller group of studies (23.2%) measured the personal characteristics of consumers that expressed concern about antimicrobials. The most common and consistent features of these consumers were gender, age, income, and education. Overall, studies tended to be dominated by either willingness-to-pay studies or likert scale questionnaires (73.6% of all studies). The popularity of these methods may have contributed to the relative lack of studies that characterized worried consumer demographics or reasons for their perspectives. We recommend more qualitative research into consumer views on this topic, which may better elucidate consumer decision-making and mentality. In addition, more research into the difference between

75 what consumers claim is of concern and their ultimate purchasing decisions would be especially  
76 valuable.

77

## 78 **INTRODUCTION**

79

80 The rise of antimicrobial resistant organisms threaten human and animal health (Robinson et al.  
81 2016). In livestock production systems, antimicrobials have been used for prevention and  
82 treatment of disease and, in many countries, growth promotion (Oliver et al., 2011; Landers,  
83 2012). Antimicrobial use in animal agriculture has been linked to antimicrobial resistant bacterial  
84 infections in humans (Innes, et al. 2020). To address public concern about antimicrobial  
85 resistance, regulation has been promulgated to limit the use of certain drugs in animal agriculture  
86 (Kirchhelle, 2018). A recent amendment in 2017 to the Veterinary Feed Directive of the United  
87 States Department of Agriculture's (USDA) Animal Drug Availability Act of 1996 changed drug  
88 use allowances in U.S. animal agriculture industries. This amendment prohibits the use of  
89 medically important antimicrobials in food-producing animals for growth promotion or to  
90 improve feed efficiency, and requires approval from the overseeing veterinarian for  
91 antimicrobials that are administered via feed and water (FDA 2015, 2017, 2019). In addition to  
92 this federal regulation, state governments such as California (California SB27, 2015) and  
93 Maryland (Pinsky et al, 2017) have implemented laws in 2018 that also restrict antimicrobial  
94 use in agriculture. As with the VFD, the effectiveness of these bills has yet to be assessed.

95

96 Governmental regulatory efforts may prove to be an important step in decreasing antimicrobial  
97 resistance development in the animal agriculture, however, private industry standards are

98 increasingly the impetus for progress in the agri-food system (Busch and Bain 2004). Many  
99 agricultural standards are voluntary and put forth by private companies and trade associations  
100 (e.g., national dairy associations) to avoid further government regulation (Busch and Bain 2004,  
101 Jones and Pawlinger 2017). These shifts are also driven by the need to maintain their consumer  
102 base in a saturated market (Nestle 2002) and therefore attempt to address consumer demand for  
103 safe food of a uniform quality that is produced under conditions consumers can support (Busch  
104 and Bain 2004, Jones and Pawlinger 2017). For example, large animal product purchasers, such  
105 as McDonalds and public-school systems, have committed to using “antibiotic free” animal  
106 products (Polansek 2014; McDonald’s Global Vision for Antibiotic Stewardship in Food  
107 Animals, 2017). Consumers cite human health, animal welfare, and environmental sustainability  
108 as reasons for their concern about antimicrobial use in animal agriculture (Foundation IFIC,  
109 2018). Consumer attitudes may also reflect confusion about modern production practices. For  
110 example, some consumers purchase “raised without antibiotics” animal products because of their  
111 concerns for animal welfare (Goddard et al., 2017; Karavoilias et al., 2017). However, these  
112 consumers may not understand that antimicrobials are necessary for the prevention and treatment  
113 of diseases in animals, and thus a complete ban could lead to increased animal suffering in cases  
114 of clinical infections if they are withheld (Oliver et al., 2011; Karavolias et al., 2017).

115  
116 Despite potential consumer confusions about the role of antimicrobials in animal agriculture,  
117 such perceptions are important drivers of animal husbandry practices across the wider  
118 commodity chain. The adoption of practices market products with labels such as “no antibiotics  
119 ever” in the poultry industry, for example, exerts downward pressure on the production practices  
120 of broiler integrators (Bowman et al. 2016). Similar consumer driven pressures have been noted

121 across other animal production industries as well (eg. Singer et al. 2019). In short, the increasing  
122 prevalence of “antibiotic free” labels on food, and emerging evidence that consumers will pay  
123 more for meat with this label, mean that the consumers influence the governance of wider food  
124 systems.

125

126 While research on consumer preferences for meat purchase and consumption is explored in the  
127 scientific literature, the salience of antimicrobial use in food production calls for a closer  
128 examination of the scientific evidence on this topic. To the best of our knowledge, no review has  
129 investigated consumer perceptions of antimicrobial use in animal agriculture; we fill this gap  
130 with a scoping review. We aim to summarize the extant research on this topic, identify research  
131 areas that are both well-studied and ignored, and understand what consumers see as the risks and  
132 benefits of antimicrobial use in animal agriculture. Further, we identify the methods used to  
133 assess consumer perception in order to gauge existing methodological gaps in the literature.

134

## 135 **MATERIALS AND METHODS**

136 This review was completed in compliance with the guidelines outlined in the PRISMA Extension  
137 for Scoping Reviews (Tricco et al. 2018). The review team was composed of experts in the field  
138 (Redacted for Review), a research librarian (Redacted for Review), and students (Redacted for  
139 Review).

140

## 141 RESEARCH QUESTION AND DEFINITIONS

142 This review aims to identify and describe peer-reviewed and grey literature relevant to the  
143 research question: "What are consumer perceptions concerning antimicrobial use in animal

144 agriculture in the United States, Canada, and the European Union?" and utilizes the following  
145 definitions.

Reference needed for the text from Line 147 to Line 165

146

147 *Consumer perceptions and attitudes:* Consumers are defined as individuals who purchase food.

148 Of particular interest to this review are consumers who purchase animal-based products for

149 personal or familial consumption or consumers who choose not to purchase animal-based

150 products and their reasoning. Perception encompasses awareness, understanding and

151 interpretation of an individual's surroundings. Attitude includes, but is not limited to, one's

152 thoughts, feelings, beliefs, and willingness to pay for food. In combination this review will assess

153 the level of awareness and understanding of general audiences in regard to antimicrobials in

154 animal products and animal agriculture.

155

156 *Antimicrobials:* Antimicrobials are defined here as drugs that are administered to patients to treat

157 and/or prevent infection, illness, and/or other health problems resulting from exposure to

158 microbial organisms. These can include antibiotics, antifungals, antiprotozoals, and antivirals.

159 For the purposes of this review we are interested in antimicrobials administered to maintain the

160 health and well-being of agricultural animals raised for human consumption, of which antibiotics

161 (i.e., drugs that target bacteria) are primarily used.

162

163 *Animal agriculture:* Animal agriculture is the husbandry of animals for consumption of their

164 meat or other products. Animals included in this category are as follows: ruminants (cattle,

165 sheep, goats, bison), pigs, poultry (chickens, turkeys, ducks), and fish (shellfish and finfish).

166 A protocol for this review was registered on the Open Science Framework (osf.io) on August 8,  
167 2019, and can be located at <https://osf.io/rp9ak/>. An amendment was made at the initiation of full  
168 text screening and was uploaded on December 23, 2020, and can be located at  
169 <https://osf.io/mcd93/>.

## 170 SEARCH STRATEGY, DATABASES, AND GREY LITERATURE SOURCES

171 A comprehensive search was developed for CAB Abstracts and Global Health (CABI) using  
172 search terms related to consumer perceptions, antimicrobials, and animal agriculture. The search  
173 was translated and run in ABI/Inform (ProQuest), AGRICOLA (EBSCOhost), BIOSIS Citation  
174 Index (Clarivate Analytics), Business Source Complete (EBSCOhost), FSTA/Food Science and  
175 Technology Abstracts (Clarivate Analytics), Medline (PubMed), ProQuest Dissertations and  
176 Theses Global (ProQuest), VetMed Resource (CABI), and Web of Science Core Collection  
177 (Clarivate Analytics). Searches took place in two rounds: an initial search, and an updated  
178 search. The first round of searches were executed on August 14, 2019, without date or language  
179 restrictions. Search strategy and number of results for each database are found in Appendix A.  
180 Grey literature sources were searched between August 24, 2019 and September 24, 2019.  
181 Publications and factsheets were manually searched in: Agriculture and Agri-Food Canada;  
182 Canadian Antimicrobial Resistance Surveillance System; Centers for Disease Control and  
183 Prevention (CDC) Antibiotic/Antimicrobial Resistance Reports and Publications; Environmental  
184 Working Group; European Commission; European Food Safety Authority; Food and Agriculture  
185 Organization (FAO) of the United Nations; Food and Drug Administration of the United  
186 States (FDA) Antimicrobial Resistance Information from FDA; FDA Guidance Documents; Pew  
187 Charitable Trusts Antibiotic Resistance Project; U.S. Department of Agriculture (USDA)  
188 Economic Research Service; and World Health Organization (WHO). Links, search strategies,

189 and number of results for each grey literature source are found in our registered protocol. A  
190 second round of searches was undertaken in May 2021. On May 10, 2021 a second round of  
191 searches were undertaken, without language restrictions, but data restricted from August 14,  
192 2019 to May 10, 2021. From May 19-28, 2021, a second round of grey literature searches was  
193 also undertaken, utilizing the same grey literature databases as stated above. Documentation of  
194 search terms and databases used for the academic search is documented in Appendix A is  
195 available on the project's OSF page: <https://osf.io/p82fg/>  
196 Documentation of search terms and databases used for the grey literature searches is documented  
197 in Appendix B, and is available on the project's OSF page: <https://osf.io/frxsw/>  
198

## 199 CITATION MANAGEMENT

200 References returned from all database and grey literature searches were imported or manually  
201 entered into Zotero citation management software (Version 5.0.73). Following deduplication in  
202 Zotero, the remaining records were imported to the screening software Covidence  
203 (covidence.org), where additional duplicates were identified. The remaining records were  
204 eligible for inclusion in the review.

## 205 STUDY SELECTION AND SCREENING

206 Studies were considered eligible for inclusion in this review if they: (1) include reference to  
207 antimicrobial use in food animals, (2) include consumer viewpoints about antimicrobial use in  
208 food animals, (3) describe studies in the United States, Canada, or the European Union, (4) are  
209 originally published in English, and (5) describe primary data collection. Studies were excluded  
210 if they did not satisfy all inclusion criteria.

211 Each record was evaluated against the predetermined inclusion criteria by two independent  
212 reviewers at the level of title and abstract. Those records that were not eliminated at this stage  
213 were then considered by two independent reviewers at the full-text level. For both the title and  
214 abstract stage and full-text stage, conflicts were resolved either by consensus or by a third,  
215 independent reviewer.

216 Number of sources included at each stage of retrieval, screening, and data extraction, as well as  
217 reasons for exclusion at the full-text screening phase, are indicated in the PRISMA diagram  
218 (Figure 1). As prescribed for scoping reviews (Tricco et al. 2018, Arksey and O'Malley 2005),  
219 risk of source bias was not evaluated during consideration for inclusion.

## 220 DATA CHARTING AND ANALYSIS

221 Based on trends and concepts identified during screening, a list of relevant data categories was  
222 developed to guide data extraction. Each of the three main reviewers [Redacted for Review]  
223 extracted data from five papers to evaluate the list's comprehensiveness. Additional categories  
224 were added after this pre-testing, as well as during the extraction process when new trends were  
225 identified. One of the three main reviewers extracted data from each of the studies. Multiple  
226 discussions throughout this process were used to ensure consistency. The data from this charting  
227 process is available at: <https://osf.io/27pyw/>. This data includes charting from both the initial and  
228 the updated searches.

229 Extracted data includes: study type (qualitative or quantitative), publication source, author  
230 affiliation, publication date, country of study population, number of participants, response rate,  
231 population selection criteria, product of study, data collection method, qualitative and  
232 quantitative models and associated analysis units (willingness to pay and Likert scale), specific



233 results about perceptions of antimicrobial use and several binary variables for statistical analysis.

234 The extracted data were coded in anticipation of statistical analysis.

235 When developing the protocol for this review, we limited our scope to studies about the U.S.,

236 Canada, and the European Union (including the United Kingdom). We made this decision

237 because these countries have similar regulatory environments and close trade associations. We

238 also excluded texts written in non-English languages due a lack of reading proficiency among

239 authors. Therefore, some otherwise relevant Canadian and European studies were excluded.

240 Between the title and abstract stage and full text screening stage of this review, we further

241 decided to exclude any texts that did not contain primary data collection (reflected in the

242 amended protocol). As a result, most of the originally included news articles and opinion pieces

243 became excluded. This decision was made in an effort to avoid bias as we could not ensure that

244 all non-academic texts about this topic were captured. Several news articles with extractable data

245 were included in the final analysis because they cited studies that were not otherwise captured

246 through database and grey literature searches. Although our search strategy was comprehensive

247 in its use of "antimicrobial" and the other associated terms listed above, extracted studies about

248 consumer concern all focused on antibiotic use as opposed to antimicrobial use; and the term

249 "antibiotic" was overwhelmingly used in these studies. For this reason, we use the more specific

250 term "antibiotics" for the results and discussion sections.

251 To answer our proposed question we performed additional analysis on the studies that measured

252 consumer concern. For manuscripts which utilized Likert scale surveys, studies were classified

253 as finding that consumers were "concerned" if there was, on average, a higher than neutral level

254 of agreement with a statement that expressed concern about antibiotic use. Conversely, Likert

255 surveys that discovered a lower than neutral level of agreement for similar statements were

256 coded as finding that consumers were “not concerned.” Willingness-to-pay studies that showed  
257 consumers were willing to pay more for food with antibiotic-free traits (at a statistically  
258 significant level) were labeled as studies that showed consumers are “concerned.” Similarly,  
259 willingness-to-pay studies that failed to find consumers would pay more for antibiotic-free food  
260 were coded as having found consumers to be “not concerned.” Some studies found that  
261 consumers agreed with some concern-type statements while disagreeing with others; such studies  
262 were labeled as “mixed concern.”

263 Reasons for consumer concern were identified and each reason was given a unique identifier for  
264 analysis. For studies that investigated the characteristics of people who are concerned about  
265 antimicrobial use, demographics (e.g., gender, religion) determined to be statistically significant  
266 were tallied. Most studies that evaluated consumer characteristics concluded that multiple  
267 characteristics were associated with antibiotic use concerns. This resulted in more consumer  
268 characteristics identified than papers identifying such traits.

269 The coded spreadsheet of extracted data was imported into Stata (Version MP 16) to perform  
270 descriptive statistical analysis. Statistical tables including frequencies and percentages were  
271 generated to identify dominant categories for each extracted data type. More in-depth analysis of  
272 results was used in conjunction with frequency and percentage statistics to assess for gaps in the  
273 research.

274

## 275 **RESULTS**

276

277 Study selection and exclusion criteria are summarized by the PRISMA flow diagram illustrated  
278 in Figure 1. From the 3,560 citations imported for title and abstract screening, 368 were chosen  
279 for full text screening and 125 met inclusion criteria. Table 1 shows publication date ranges,  
280 study locations, and author affiliations for studies ultimately selected for inclusion. Due to the  
281 inclusion criterion of primary data collection, most of the relevant texts were published in  
282 academic journals (67.2%) with news articles a distant second (7.2%); the remaining 25.6% were  
283 a mix of other publication types, such as dissertations. Publications before 2009 comprise 30.4%  
284 of the sample, 27.9% were published between 2010 and 2015, and 42.4% were published  
285 between 2016 and 2021. The majority of research was conducted in the United States (54.4%).  
286 Canada (9.6%) and Germany (6.4%) were the next most commonly studied countries. Most  
287 studies (72%) were conducted solely by university researchers. Government researchers  
288 accounted for 5.6% of studies and industry researchers comprise another 6.4%.

289  
290 Many animal agriculture products were investigated, with no single type dominating the body of  
291 literature (Table 2). The most frequently investigated single product categories are pork (15.2%)  
292 and beef (13.6%), poultry (10.4%), and dairy (10.4%). The most frequent product category is the  
293 generic category (24%), which includes studies that investigated “food,” “organic food,”  
294 “meats,” and/or other similarly broad categories. Multiple product studies were tied for the  
295 second most frequent category (15.2%) and included a range of product combinations from pork  
296 and eggs to dairy products and apples.

297  
298 Studies often had multiple themes but those tallied in Table 2 were identified by reviewers as the  
299 primary focus of each study. We found 18 distinct research themes among which antibiotic

300 perception data could be assessed. Few publications (12.8%) had a central focus on consumer  
301 perceptions of antibiotics. More commonly, antibiotics were one of several consumer concerns  
302 that were measured in a study. Of the studies with a main focus on antibiotic use, dairy (n = 6)  
303 and beef (n = 4) were the most common, followed by pork (n = 2) (See Figure 2). Other core  
304 topics for studies include production characteristics (23.2%), food safety (16%), and credence  
305 claims/product attributes (10.4%). The production characteristics category includes any  
306 publication that focuses on agricultural practices and other aspects of production, e.g., rearing  
307 practices, conventional versus organic production, and other similar foci. The credence  
308 claims/product attributes category encompasses publications with a primary focus on perceptions  
309 of particular food characteristics, e.g., raised without antibiotics, natural, organic, and other  
310 labeled product attributes.

311  
312 The publications under review were dominated by quantitative methods (82.4%; see Table 3).  
313 Qualitative methods—including interviews, focus groups, and document analysis—were used in  
314 11.2% of the studies, and mixed quantitative/qualitative techniques were used in 6.4% of studies.  
315 Data collection was divided into five categories: surveys (56%), choice experiments (7.2%),  
316 qualitative methods (6.4%), document and literature analysis (6.4%), and mixed approaches  
317 (20.8%). Four studies (3.2%) did not identify their method of data collection. In terms of specific  
318 quantitative techniques, willingness-to-pay studies (34.4%) and Likert scale surveys (39.2%)  
319 were the most utilized techniques used to ascertain consumer perceptions.

320  
321 Economics is the dominant field of research that investigated consumer attitudes and concerns  
322 with antibiotic use in animal agriculture, with 44.8% of the texts describing an economic or

323 marketing component of consumer perceptions. Of these papers, 17.9% did not collect original  
324 data and 12.5% had unclear or missing information. The remaining publications (69.6%)  
325 consisted of consumer surveys administered to a varying number of people (min: 154, max:  
326 7795). These studies used a variety of econometric analyses; 14 studies used a choice experiment  
327 approach, three used different kinds of stated preference approach, and eight used econometric  
328 analyses without assessing consumer preferences. Other analysis methods were also used;  
329 11 studies reported only descriptive statistics and univariate or bivariate analysis, and the final  
330 four studies reported only qualitative information. Of these 56 economics-focused studies, 25%  
331 primarily focused on antibiotics. The other studies investigated antimicrobial use as a component  
332 of animal rearing or a characteristic of food products themselves. Additionally, the challenge of  
333 antimicrobial resistance, with regards to public health, was a particular source of concern with  
334 only one study (Dohle et al. 2013), which explored the environmental consequences of  
335 antimicrobial use and antimicrobial resistance development. Instead, antimicrobials were studied  
336 generally as a food safety issue, or with a set of other issues such as organic vs. conventional  
337 farming, animal welfare, and food quality. In most studies that utilized a willingness-to-pay  
338 model, people surveyed were willing to pay a premium for antibiotic-free products but this  
339 varied (between 0% and approximately 80%) depending on the geographic, social and cultural  
340 settings investigated.

341

#### 342 CONSUMER CONCERN ABOUT ANTIBIOTICS

343

344 Research on consumer perceptions of antibiotic use in animal agriculture encompasses a wide  
345 variety of subjects, and researchers utilized several measurement techniques, which challenges

346 the ability to summarize findings among studies. Nevertheless, most studies found that consumer  
347 perceptions of antibiotic use exist along a spectrum. As described in the methods section, studies  
348 that gauged a level of concern about antibiotic use were coded as finding that consumers were  
349 “concerned about antibiotic use,” “not concerned about antibiotic use,” or had “mixed concern  
350 about antibiotic use.” A total of 84.8% of studies were able to be classified in this way. The  
351 remaining studies measured other aspects of consumers perceptions, such as whether they know  
352 what an antibiotic-free label means (eg. Abrams 2010; Nuppenau 2015).

353

354 Among the literature investigated, 65.6% of studies concluded that consumers were concerned  
355 with antibiotic use in food production, 8% were not concerned, and 11.2% showed mixed  
356 concern (see Table 4). Figure 2 summarizes the findings of studies that gauged consumer  
357 concern by tallying the number of studies by product type, method used and level of concern.  
358 Likert scale surveys and willingness-to-pay studies dominate this research (73.6%). Consumers  
359 tended to demonstrate concern regardless of product type. The only exception was beef, a  
360 product in which consumer concern was mixed.

361

362 While the majority of studies (106 studies) found some measurable level of consumer concern  
363 about antibiotic use in food production, far fewer studies investigated why consumers are  
364 concerned. Among all studies, 29.6% (37 studies) investigated why consumers are concerned  
365 about antibiotics. Among these, personal health and safety comprise half of the reasons given  
366 (67.6% including the safety category and all categories with “human health”; see table 4). The  
367 next most commonly cited reason for concern was animal welfare, comprising 32.4% of studies  
368 where perspectives were evaluated. It is notable that the evolutionary consequences of antibiotic

369 use—the emergence of antibiotic resistant bacteria in the world—is mentioned in only four  
370 studies (10.8% of those that examined reasoning) and this concern was always in combination  
371 with others. However, it is possible that concerns about antibiotic resistance were an  
372 unmentioned or implied aspect of human health and safety concerns.

373

374 The question regarding the demographics of individuals who share concerns about antibiotics in  
375 food production is also relatively neglected in the literature, only 24% (30 studies) of all studies.  
376 The most common descriptors across studies are gender (n=13), income (n=10), age (n=9), and  
377 education (n=6). In general, female, older, highly educated, and high-income were the  
378 demographic characteristics most consistently associated with consumer concern about  
379 antibiotics (see Table 5). While the findings for each of these features were consistent, there was  
380 at least one contradictory finding for each of these characteristics (e.g., one study found that men  
381 are more concerned about antibiotic use while all the others found more concern among women  
382 participants). Other personal identifiers included eating and shopping habits, level of trust, type  
383 of work, political views, ethical views, religion, race, awareness of the issue, location, and family  
384 structure. The results from these categories were found in few studies and without consistency  
385 across studies.

386

387 Although there are exceptions, questions aimed to investigate the politics of consumer choices  
388 and antibiotic use were ignored almost universally. Wolfe et al. (2016) conducted a large survey  
389 of consumers which found that two-thirds would vote hypothetically to restrict antibiotic use to  
390 medical treatment only, and men were more likely to reject such a policy. Conversely,  
391 individuals with higher incomes and those exposed to animal welfare media were more likely to

392 vote for such a policy. Goddard et al. (2019) examined the link between people’s moral  
393 foundations and their attitudes toward purchasing and voting decisions for various credence  
394 attributes. They found that those who agreed with individualizing moral foundation statements  
395 (ethical concerns centered around impacts on individuals rather than commitment to the concerns  
396 of a wider social group) were more likely to purchase antibiotic-free products and also more  
397 likely to vote to ban such products compared to those who did not agree with such moral  
398 foundation statements. Finally, Lusk et al. (2007) conducted a willingness-to-pay study that  
399 showed consumers were both willing to pay more for antibiotic-free pork and also pay a  
400 premium for a ban on such products.

401

## 402 **DISCUSSION**

403 Research that investigates consumer concern about antibiotic use in animal agriculture  
404 production is gaining traction. Two-thirds of studies that met our inclusion criteria were  
405 published within the past ten years. This trend may relate to an increased public awareness and  
406 popularization of antibiotic-free and organic products, but longitudinal analysis was not  
407 conducted to confirm this theory.

408

409 Overall, consumer perceptions of antibiotic use in animal agriculture is overwhelmingly  
410 negative. Out of the studies that measured a degree of consumer concern (n=106), 77.4% found  
411 that there is some level of concern. This is unsurprising, given the number of studies that show  
412 consumer concern about potential practices that can be conceived as “contamination” (Brewer  
413 and Rojas 2008). While we have not completed reviews outside the ambit of antibiotics, several



414 studies found that genetically modified foods (Wunderlich and Gatto 2015), pesticides,  
415 (Boccaletti et al. 2000), and hormones (Lusk et al. 2003) are also of great concern to consumers.

416

417 Most studies indirectly measured antibiotic concern through credence labels (e.g., "raised  
418 without antibiotics" and "USDA Organic"), rearing practices, and food safety research in which  
419 antibiotic use is one of several related practices that were studied. Thus, in many cases, we had to  
420 extract the antibiotic-related findings from a study that was exploring a wider issue. This  
421 demonstrates a large gap in the literature, few studies were designed to assess consumer  
422 perspectives on antibiotic use as their primary focus.

423

#### 424 WHY ARE CONSUMERS CONCERNED ABOUT ANTIBIOTICS IN ANIMAL

#### 425 AGRICULTURE?

426

427 While the reviewed papers demonstrate that consumers tend to be concerned about antibiotic use  
428 in animal agriculture, there are mixed findings as to why consumers are concerned. Although  
429 few studies (24%) investigated why consumers are concerned, findings indicate interesting and  
430 inconsistent trends. Primarily, consumers are concerned about health and safety, and then animal  
431 welfare.

432

433 Consumers who expressed reasons for concern may be ill-informed about animal agriculture  
434 production processes and antimicrobial uses. For example, consumers cited concerns that  
435 administration of antimicrobials in animals may present health and safety hazards to consumers.  
436 Although without further investigation, we cannot say what exactly those concerns are, one

437 conjecture is that consumers believe that drug administration leads to antibiotic residues on or in  
438 animal products that could contribute to consumer exposure to active antimicrobial agents  
439 (National Chicken Council 2015). However, the United States has strict regulations about  
440 antibiotic residues in animal products (FDA 2018). For example, the U.S. Department of  
441 Agriculture (USDA), in concert with the FDA and Environmental Protection Agency, founded  
442 the U.S. National Residue Program, monitors residues in meat through its Compound Evaluation  
443 System. This ensures the risk of exposure to antimicrobial residues in meat is low (NRC 1999).  
444 Similar regulatory efforts exist for non-meat animal products. It is possible that consumer's  
445 concern for human health is, in fact, expressing an unstated concern around antimicrobial  
446 resistance, however, none of the papers explored this potential conflation of these two terms.  
447 From a producer perspective, consumer concerns about animal welfare may appear similarly  
448 misguided. Some have argued that reducing on-farm antibiotic use is often worse for animal  
449 welfare because of the increased number of infections that tend to accompany this move  
450 (Karavolis et al. 2018, Singer et al. 2019).

451  
452 Consumers may not, and likely do not, understand the nuances of antimicrobial use in animal  
453 production, specifically in terms of disease treatment, metaphylaxis, prophylaxis, and growth  
454 promotion/feed efficiency. Consumer knowledge about these complexities is hard to evaluate,  
455 and no studies addressed the terms with depth. Primarily, consumers associated antibiotic use  
456 with intensive animal production, lower animal welfare, and poor animal health. The reality from  
457 the producer side, however, is more nuanced, as animals may become infected with bacteria or  
458 other infectious agents even under optimized husbandry conditions, and according to producers,  
459 maintaining good animal welfare means treating animals when they are sick (Singer et al. 2019).

460 This producer-centric view is more attuned to the complex trade-offs involved in using  
461 antibiotics, but is also indicative of a sizable gulf in the attitudes between consumers and  
462 producers with regards to the relationship between antibiotic use and animal welfare. Singer et  
463 al.'s (2019) survey of producers shows that they are aware of this gulf of understanding, even if  
464 consumers are not. They found that producers felt that consumers believe raising animals without  
465 antibiotics would have significant improvement on animal husbandry, even as producers  
466 themselves did not believe this.

467

468 Abrams et al.'s (2010) qualitative study of pork consumers suggests that labels are a fairly  
469 effective and often used signaling device for consumers who wish to avoid potential risks related  
470 to health and safety. While experts in animal production can point to statistics on the low  
471 prevalence of antibiotic residue found on meat, this work suggests that lay consumers tend to  
472 latch on to an easily understood, qualitative marker of risk. In the case of pork meat, the  
473 prevalence of labels provides a quick and understandable signal of risk reduction. The prevalence  
474 of labels stating the absence of antibiotics (the "no" labels as the authors refer to them) provide a  
475 convenient guide for consumers who are making many of their food purchasing decisions in a  
476 compressed time period.

477

478 Typically, when discordance is found between consumer perceptions and producer realities, it is  
479 often accompanied by a call to "better educate" the consumer. We reject that "better education"  
480 will lead to different results. Instead, we posit that consumers are not ignorant or irrational, but,  
481 in fact, operate from a fairly rational and well-educated position. A closer look at the qualitative  
482 investigations into why consumers are concerned shows a fairly knowledgeable base of

483 consumers in terms of how the food system works. What is common across these studies,  
484 however, is that some consumers have associated antibiotic use as part and parcel of a  
485 demonized view of the industrialized food system. Sonntag et al. (2019), for example, found a  
486 wide range of consumer knowledge—from accurate understanding to misinformation—but a  
487 fairly consistent attachment between antibiotic use and an industrial process that is regarded as  
488 unhealthy for chicken and, by extension, people.

489

490 “Better education” is not necessarily an inappropriate intervention, however, available evidence  
491 in this review suggests it may not be effective as the only device that bridges the knowledge gap  
492 between producers and consumers, especially given that consumer antibiotic use concerns are  
493 tied to their negative feelings about modern industrial production systems. The relative paucity  
494 of research into why consumers are concerned about antibiotics shows that there is clearly more  
495 work to be done in this area. The literature to date has largely focused on how much consumers  
496 are willing to pay, or on quantifying the level of consumer concern. Unfortunately, the literature  
497 has not yet addressed the emotive attachments consumers have to food, the kinds of decision-  
498 making processes they make while in the grocery store, and the sorts of values beyond price they  
499 have when making purchasing decisions. Researchers may do well to consider ethnographic or  
500 other qualitative techniques to elucidate these questions.

501

## 502 WHO ARE THE CONCERNED CONSUMERS?

503

504 The literature has not comprehensively characterized individuals who may or may not be  
505 concerned about antibiotic use in animal agriculture. There were 24 studies that addressed this

506 question, and of these studies 14 different variables were identified as significant indicators of  
507 consumer concern. The most common variables found to be significant were gender, age,  
508 education, and income. Collectively, these studies illustrate that older, highly educated, high  
509 income females are most concerned about antibiotics. This picture of the “concerned consumer”  
510 is not a surprising one, and indeed, seems to play into the stereotype that organic food often  
511 serves as a luxury item for upper-class consumers. Nevertheless, these findings were not  
512 consistent across studies, and other, less explored variables were implicated in these papers that  
513 paint a potentially more complex picture of the concerned consumer.

514

515 There were a host of other characteristics found to be of significance, but they were limited to  
516 just a few studies, with little consistency in findings. Both “high trust” and “low trust”  
517 individuals were found to be concerned along with “altruistic people” and those with  
518 “individualizing moral foundations.” Both “Protestants” and “atheists” were also found to be  
519 concerned. These differences could be the result of different methods and/or the differences in  
520 study populations that researchers utilized. Perhaps with more research more stable typologies  
521 will emerge as we have seen with gender, income, education, and age.

522

523 One small (three studies) but consistent finding is that a consumer with a high level of  
524 knowledge and awareness tends to be concerned about antibiotics. Those with more knowledge  
525 seem to be more concerned, but as we discussed above, the kind of knowledge one has could  
526 greatly impact their stance on antibiotic use in animal industries. A high-knowledge consumer  
527 does not necessarily know specific information about antibiotic regimes and their role in animal  
528 production. Instead, “knowledge” often means a consumer understands the rules of thumb that

529 labels provide, or has a general understanding of how our food system works. We suggest here  
530 that the relationship between “high knowledge” consumers and concern about antibiotics further  
531 strengthens our contention to be wary of calls for further education of consumers. Such  
532 education is already being provided through labels, but it does not necessarily translate into a  
533 nuanced understanding of the role of antibiotic use in agriculture. Consumers have different  
534 ways of evaluating agricultural production than producers, and the evidence so far suggests that  
535 is unlikely to change.

536

537 Finally, the relative dearth of explicitly political studies (three studies) is surprising and indicates  
538 a clear need for further research. The so-called “vote/buy gap,” where consumers will purchase a  
539 product that they will also vote to ban, is well documented in other literature (eg. Norwood et al.  
540 2019). This gap points to the ways in which people compartmentalize their beliefs and actions.  
541 The opposite side of the vote/buy gap is the growing visibility of consumption choices as a form  
542 of politics (eg. Jackson et al. 2009). This can include campaigns to boycott particular products  
543 because of their owner’s political views (Tomhave and Vopat 2018), or efforts to purchase  
544 products that meet ethical standards of production and trade (Johnston and Szabo 2011; Rossel  
545 and Schenk 2018). None of these political aspects of food consumption are covered by research  
546 into antibiotics and consumer preferences. Numerous economics studies have established the  
547 degree to which consumers will, or will not, pay extra money for antibiotic-free products. But  
548 with a few exceptions, none of these studies examine the extent to which these price preferences  
549 are related to political preferences with regard to agricultural policy. This is of particular concern  
550 because, as Paul et al. (2019) note, a potential gap between the public’s consumption and voting  
551 behavior can complicate supply chain decision-making due to “increased uncertainty regarding

552 what ‘social license’ (e.g., freedom to operate) producers will maintain and what production  
553 practices will be accepted in the future” (pg. 102).

554

555 STUDY LIMITATIONS:

556

557 There are several limitations to this review. First, this review should not be considered  
558 generalizable to populations outside of the United States, Canada, the United Kingdom, and  
559 members-states of the European Union. Secondly, we only included manuscripts written in  
560 English. This may have biased findings, given that Canada and the European Union have  
561 multiple official languages, and this review may have excluded relevant literature that was  
562 written in non-English languages. Similarly, selection bias may have occurred because we  
563 required that studies have primary data collection with transparent and extractable methods and  
564 results. Many excluded works were grey literature sources produced by industry members. Thus,  
565 this research is skewed to peer-reviewed literature conducted by academic institutions.

566

567 **CONCLUSION**

568 This review was prompted by our interest in consumer perceptions about antimicrobial use in  
569 animal agriculture. Initial readings about this topic indicated that reasons for consumer concern  
570 are wide-ranging and consumer confusion exists about the use of antimicrobials in animal  
571 agriculture. Despite confusion, consumer perceptions are an important influence on animal  
572 agriculture practices. To understand what consumers see as the risks and benefits of  
573 antimicrobial use in animal agriculture, and to gauge which research and methodological gaps  
574 exist in this literature, we conducted a scoping review. Through an exhaustive search strategy

575 and systematic screening process, we identified 125 texts that fulfilled our inclusion criteria. We  
576 extracted relevant data from these texts for analysis, including the available data on consumer  
577 concern. The majority of studies used quantitative methods, willingness-to-pay studies and  
578 Likert surveys prominent among them, and were conducted by university researchers on U.S.  
579 populations. The studied products and themes varied.

580

581 Not every text measured consumer concern, and fewer assessed reasons for concern or identified  
582 characteristics of concerned people. Those that measured concern focused on antibiotic use, a  
583 priority to reduce antimicrobial resistance. The different topics of interest and methods used  
584 made synthesis of findings about consumer concern difficult. We developed a rubric to  
585 categorize each study's population into “concern,” “mixed concern,” or “no concern” regarding  
586 antibiotic use in animal agriculture. Most studies found some level of concern or mixed concern.  
587 Concern for human and animal welfare were the most common reasons cited. The animal  
588 welfare concern may derive from the consistent associations that consumers construe between  
589 antimicrobial use and industrial agriculture practices that they perceive as having negative  
590 consequences for the produced animals. It is notable that the emergence of resistant bacteria,  
591 which is a consequence of antibiotic use, is only mentioned in four studies and never as a study’s  
592 explicit focus.

593

594 Consumers may not understand the nuances of antimicrobial use in animal agriculture or  
595 specifics about disease treatment, metaphylaxis, prophylaxis, and growth promotion/feed  
596 efficiency uses. However, we do not recommend the typical tactic to educate consumers given  
597 that consumers may already be well informed about some aspects of animal production. We do



598 propose that more research should focus on consumer concern about antimicrobial use rather  
599 than appending a few questions about antimicrobial use to a study that has a broader focus.  
600 Similarly, more in-depth qualitative research is also needed on this topic because the  
601 overwhelming use of quantitative methods does not allow for a more nuanced understanding of  
602 consumer decisions. Further research into the politics surrounding consumer beliefs and  
603 decisions could be especially valuable as other research has evidenced a vote/buy gap between  
604 what people claim to be of importance and their purchasing decisions.

605  
606 The dominance of university researchers and U.S. studies likely resulted from inclusion criteria  
607 that required texts be in English and have primary data collection. We cannot say if a more  
608 expansive criteria would lead to others results, but there were several seemingly relevant studies  
609 that could be incorporated into a future review. We also recognize that our criteria was limiting  
610 in the sense that non-academic types of literature (e.g. opinion pieces) were, with few exceptions,  
611 not captured and/or excluded. Future research into these other types of literature could be  
612 beneficial to further explain consumer perceptions and identify how these perceptions are  
613 acquired.

614

615 **Acknowledgements:**

616 The authors sincerely thank Alison E. Stout and Genevieve Jones for their efforts in searching  
617 for grey literature and screening captured texts. This manuscript is the result of collaborations  
618 formed during the Human Dimensions of Antimicrobial Resistance in Agriculture Workshop in  
619 Nebraska City, NE, USA in May 2019. This research was funded by USDA-NIFA grant number

620 2019-67017-29114, which allowed for two in-person meeting of the co-authors, and USDA-  
621 NIFA grant number 2018-68003-27467, which provided research support for JRB and DL.

622

623

624

## REFERENCES

625

626 Arksey, H., & O'Malley, L. (2005). Scoping studies: towards a methodological  
627 framework. *International Journal of Social Research Methodology*, 8(1), 19–32.

628 <https://doi.org/10.1080/1364557032000119616>

629

630 Bishop, P. A., & Herron, R. L. (2015). Use and Misuse of the Likert Item Responses and  
631 Other Ordinal Measures. *International Journal of Exercise Science*, 8(3), 297–302.

632

633 Boccaletti, S., & Nardella, M. (2000). Consumer willingness to pay for pesticide-free fresh  
634 fruit and vegetables in Italy. *The International Food and Agribusiness Management Review*,

635 3(3), 297–310. [https://doi.org/10.1016/S1096-7508\(01\)00049-0](https://doi.org/10.1016/S1096-7508(01)00049-0)

636

637 Brewer, M. S., & Rojas, M. (2008). Consumer Attitudes Toward Issues in Food Safety.  
638 *Journal of Food Safety*, 28(1), 1–22. <https://doi.org/10.1111/j.1745-4565.2007.00091.x>

639

640 California Legislative Body. Senate Bill No. 27 Livestock: use of antimicrobial drugs. .

641 California Legislative Counsel; 2015. Available from:

642 [https://leginfo.legislature.ca.gov/faces/billTextClient.xhtml?bill\\_id=201520160SB27](https://leginfo.legislature.ca.gov/faces/billTextClient.xhtml?bill_id=201520160SB27)

643

644 *CFR - Code of Federal Regulations Title 21*. (n.d.). Retrieved March 31, 2021, from  
645 <https://www.accessdata.fda.gov/scripts/cdrh/cfdocs/cfcfr/CFRSearch.cfm?CFRPart=556>

646  
647 Davis, M. F., & Rutkow, L. (2012). Regulatory Strategies To Combat Antimicrobial  
648 Resistance of Animal Origin: Recommendations for a Science-Based U.S. Approach.  
649 *Tulane Environmental Law Journal*, 25(2), Article 2.

650 <https://journals.tulane.edu/elj/article/view/2291>

651  
652 Foundation I.F.I.C. (2018). 2018 Food and Health Survey. Retrieved on August 2, 2019  
653 from <https://foodinsight.org/2018-foodand-health-survey>

654  
655 Goddard, E., Hartmann, M., & Klink-Lehmann, J. (2017). Public Acceptance of Antibiotic  
656 Use in Livestock Production Canada and Germany. *Proceedings in Food System Dynamics*,  
657 0(0), 424–437. <https://doi.org/10.18461/pfsd.2017.1743>

658  
659 Innes GK, Randad PR, Korinek A, Davis MF, Price LB, So AD, et al. External Societal  
660 Costs of Antimicrobial Resistance in Humans Attributable to Antimicrobial Use in  
661 Livestock. *Annu Rev Public Health*. 2020;No. 26189. [https://doi.org/10.1146/annurev-](https://doi.org/10.1146/annurev-publhealth-040218-043954)  
662 [publhealth-040218-043954](https://doi.org/10.1146/annurev-publhealth-040218-043954)

663  
664 Jackson, P., Ward, N., & Russell, P. (2009). Moral economies of food and geographies of  
665 responsibility. *Transactions of the Institute of British Geographers*, 34(1), 12-24.

666

667 Johnston, J., & Szabo, M. (2011). Reflexivity and the Whole Foods Market consumer: The  
668 lived experience of shopping for change. *Agriculture and Human Values*, 28(3), 303–319.

669 <https://doi.org/10.1007/s10460-010-9283-9>

670

671 Karavolias, J., Salois, M. J., Baker, K. T., & Watkins, K. (2018). Raised without antibiotics:  
672 Impact on animal welfare and implications for food policy. *Translational Animal Science*,

673 2(4), 337–348. <https://doi.org/10.1093/tas/txy016>

674

675 Kirchhelle, C. (2018). Pharming animals: A global history of antibiotics in food production  
676 (1935–2017). *Palgrave Communications*, 4(1), 1–13. <https://doi.org/10.1057/s41599-018->

677 [0152-2](https://doi.org/10.1057/s41599-018-0152-2)

678

679 Landers, T. F., Cohen, B., Wittum, T. E., & Larson, E. L. (2012). A Review of Antibiotic  
680 Use in Food Animals: Perspective, Policy, and Potential. *Public Health Reports*, 127(1), 4–  
681 22.

682

683 Lusk, J. L., Roosen, J., & Fox, J. A. (2003). Demand for Beef from Cattle Administered  
684 Growth Hormones or Fed Genetically Modified Corn: A Comparison of Consumers in  
685 France, Germany, the United Kingdom, and the United States. *American Journal of*  
686 *Agricultural Economics*, 85(1), 16–29.

687

688 *McDonalds-Global-Vision-for-Antimicrobial-Stewardship-in-Food.pdf*. (n.d.). Retrieved  
689 August 2, 2019, from [https://corporate.mcdonalds.com/content/dam/gwscorp/scale-for-](https://corporate.mcdonalds.com/content/dam/gwscorp/scale-for-good/McDonalds-Global-Vision-for-Antimicrobial-Stewardship-in-Food.pdf)  
690 [good/McDonalds-Global-Vision-for-Antimicrobial-Stewardship-in-Food.pdf](https://corporate.mcdonalds.com/content/dam/gwscorp/scale-for-good/McDonalds-Global-Vision-for-Antimicrobial-Stewardship-in-Food.pdf)

691  
692 Medicine, C. for V. (2021a). FACT SHEET: Veterinary Feed Directive Final Rule and Next  
693 Steps. *FDA*. [https://www.fda.gov/animal-veterinary/development-approval-process/fact-](https://www.fda.gov/animal-veterinary/development-approval-process/fact-sheet-veterinary-feed-directive-final-rule-and-next-steps)  
694 [sheet-veterinary-feed-directive-final-rule-and-next-steps](https://www.fda.gov/animal-veterinary/development-approval-process/fact-sheet-veterinary-feed-directive-final-rule-and-next-steps)

695  
696 Medicine, C. for V. (2021b). Veterinary Feed Directive (VFD). *FDA*.  
697 [https://www.fda.gov/animal-veterinary/development-approval-process/veterinary-feed-](https://www.fda.gov/animal-veterinary/development-approval-process/veterinary-feed-directive-vfd)  
698 [directive-vfd](https://www.fda.gov/animal-veterinary/development-approval-process/veterinary-feed-directive-vfd)

699  
700 National Chicken Council . 2015. Chicken check in 2015. Accessed March 8, 2019.  
701 [https://www.chickencheck.in/media/nationwide-survey-reveals-nearly-80-percent-of-](https://www.chickencheck.in/media/nationwide-survey-reveals-nearly-80-percent-of-americans-mistakenly-believe-that-chicken-contains-hormones-or-steroids/)  
702 [americans-mistakenly-believe-that-chicken-contains-hormones-or-steroids/](https://www.chickencheck.in/media/nationwide-survey-reveals-nearly-80-percent-of-americans-mistakenly-believe-that-chicken-contains-hormones-or-steroids/).

703  
704  
705  
706 National Research Council (US) Committee on Drug Use in Food Animals. (1999). *The Use*  
707 *of Drugs in Food Animals: Benefits and Risks*. National Academies Press (US).  
708 <http://www.ncbi.nlm.nih.gov/books/NBK232571/>

709

710 Norwood, Franklin Bailey, Glynn Tonsor, and Jayson L. Lusk. "I will give you my vote but  
711 not my money: Preferences for public versus private action in addressing social issues."  
712 *Applied Economic Perspectives and Policy* 41.1 (2019): 96-132.

713  
714 Oliver, S. P., Murinda, S. E., & Jayarao, B. M. (2011). Impact of antibiotic use in adult  
715 dairy cows on antimicrobial resistance of veterinary and human pathogens: A  
716 comprehensive review. *Foodborne Pathogens and Disease*, 8(3), 337–355.  
717 <https://doi.org/10.1089/fpd.2010.0730>

718  
719 Paul, A. S., Lusk, J. L., Norwood, F. B., & Tonsor, G. T. (2019). An experiment on the  
720 vote-buy gap with application to cage-free eggs. *Journal of Behavioral and Experimental*  
721 *Economics*, 79, 102–109. <https://doi.org/10.1016/j.socec.2019.02.005>

722  
723 Pinsky, Benson, Conway, Currie, Feldman, Ferguson, et al. Senate Bill 422: Keep  
724 Antibiotics Effective Act of 2017. 2017 p. 1–5.

725  
726 Polansek, T. (2014, December 10). Big U.S. school districts plan switch to antibiotic-free  
727 chicken. *Reuters*.[https://www.reuters.com/article/us-antibiotics-chicken-education-](https://www.reuters.com/article/us-antibiotics-chicken-education-idUSKBN0JO00320141210)  
728 [idUSKBN0JO00320141210](https://www.reuters.com/article/us-antibiotics-chicken-education-idUSKBN0JO00320141210)

729  
730 Robinson, T. P., Bu, D. P., Carrique-Mas, J., Fèvre, E. M., Gilbert, M., Grace, D., Hay, S.  
731 I., Jiwakanon, J., Kakkar, M., Kariuki, S., Laxminarayan, R., Lubroth, J., Magnusson, U.,  
732 Thi Ngoc, P., Van Boeckel, T. P., & Woolhouse, M. E. J. (2016). Antibiotic resistance is the

733 quintessential One Health issue. *Transactions of the Royal Society of Tropical Medicine and*  
734 *Hygiene*, 110(7), 377–380. <https://doi.org/10.1093/trstmh/trw048>

735

736 Rössel, J., & Schenk, P. (2017). How Political is Political Consumption? The Case of  
737 Activism for the Global South and Fair Trade. *Social Problems*, spx022.  
738 <https://doi.org/10.1093/socpro/spx022>

739

740 Singer, R. S., Porter, L. J., Thomson, D. U., Gage, M., Beaudoin, A., & Wishnie, J. K.  
741 (2019). Raising Animals Without Antibiotics: U.S. Producer and Veterinarian Experiences  
742 and Opinions. *Frontiers in Veterinary Science*, 6. <https://doi.org/10.3389/fvets.2019.00452>

743

744 Tomhave, A., & Vopat, M. (2018). The business of boycotting: Having your chicken and  
745 eating it too. *Journal of Business Ethics*, 152(1), 123-132.

746

747 Tricco, A. C., Lillie, E., Zarin, W., O'Brien, K. K., Colquhoun, H., Levac, D., Moher, D.,  
748 Peters, M. D. J., Horsley, T., Weeks, L., Hempel, S., Akl, E. A., Chang, C., McGowan, J.,  
749 Stewart, L., Hartling, L., Aldcroft, A., Wilson, M. G., Garritty, C., ... Straus, S. E. (2018).  
750 Prisma extension for scoping reviews (Prisma-scr): Checklist and explanation. *Annals of*  
751 *Internal Medicine*, 169(7), 467–473. <https://doi.org/10.7326/M18-0850>

752 *Veterinary Feed Directive*. (2015, June 3). Federal Register.  
753 <https://www.federalregister.gov/documents/2015/06/03/2015-13393/veterinary-feed->  
754 [directive](https://www.federalregister.gov/documents/2015/06/03/2015-13393/veterinary-feed-directive)

755

756 Wunderlich, S., & Gatto, K. A. (2015). Consumer Perception of Genetically Modified  
757 Organisms and Sources of Information. *Advances in Nutrition*, 6(6), 842–851.  
758 <https://doi.org/10.3945/an.115.008870>

759

760



761

762

763

764

**Tables:**765 **Table 1: Timeline and Source Characteristics from the Extracted Texts**

| <b>Study Characteristics</b>                | <b>No.</b> | <b>%</b> |
|---------------------------------------------|------------|----------|
| <i>Publication Date</i>                     |            |          |
| Pre-2009                                    | 38         | 30.4%    |
| 2010-2015                                   | 34         | 27.2%    |
| 2016-2020                                   | 53         | 42.4%    |
| <i>Publication Type</i>                     |            |          |
| Academic Journal                            | 84         | 67.2%    |
| Book                                        | 1          | 0.8%     |
| Dissertation                                | 7          | 5.6%     |
| Thesis                                      | 5          | 4.0%     |
| News Article                                | 9          | 7.2%     |
| White Paper                                 | 2          | 1.6%     |
| Report                                      | 7          | 5.6%     |
| Trade Journal                               | 4          | 3.2%     |
| Conference/Workshop Paper                   | 3          | 2.4%     |
| Website                                     | 1          | 0.8%     |
| Datasheet                                   | 2          | 1.6%     |
| <i>Author Affiliation</i>                   |            |          |
| University                                  | 90         | 72.0%    |
| Government                                  | 7          | 5.6%     |
| Experiment Station                          | 2          | 1.6%     |
| Industry                                    | 8          | 6.4%     |
| Think Tank                                  | 2          | 1.6%     |
| Advocacy Group                              | 1          | 0.8%     |
| University and Government                   | 1          | 0.8%     |
| University and Industry                     | 1          | 0.8%     |
| Government and Industry                     | 2          | 1.6%     |
| Group/Association                           | 4          | 3.2%     |
| Unspecified                                 | 7          | 6.4%     |
| <i>Country of Study</i>                     |            |          |
| United States                               | 68         | 54.4%    |
| Canada                                      | 12         | 9.6%     |
| Germany                                     | 7          | 6.4%     |
| Single European Union Country               | 17         | 13.6%    |
| United States and Canada                    | 3          | 2.7%     |
| Multiple European Union Countries           | 10         | 8.0%     |
| Mixed European and North American Countries | 5          | 4.0%     |
| Unspecified                                 | 3          | 2.4%     |

766

767 **Table 2: Product and Theme Focus of Extracted Texts**

| <b>Study Characteristics</b> | <b>No.</b> | <b>%</b> |
|------------------------------|------------|----------|
| <i>Product</i>               |            |          |
| Beef                         | 17         | 13.6%    |
| Pork                         | 19         | 15.2%    |
| Poultry                      | 13         | 10.4%    |
| Dairy                        | 13         | 10.4%    |
| Seafood                      | 6          | 4.8%     |
| Other Single Products        | 1          | 0.8%     |
| Mixed Products               | 19         | 15.2%    |
| Generic Categories           | 30         | 24.0%    |
| Unspecified                  | 7          | 5.6%     |
| <i>Themes</i>                |            |          |
| Antibiotic Use               | 16         | 12.8%    |
| Production Characteristics   | 29         | 23.2%    |
| Food Safety                  | 20         | 16.0%    |
| Credence Attributes          | 13         | 10.4%    |
| Organic                      | 8          | 6.4%     |
| Labels                       | 8          | 6.4%     |
| Food Quality                 | 6          | 4.8%     |
| Animal Welfare               | 6          | 4.8%     |
| Risk                         | 5          | 4.0%     |
| Natural                      | 3          | 2.4%     |
| Environmental Concerns       | 2          | 1.6%     |
| Trust                        | 2          | 1.6%     |
| Purchasing/Marketing         | 2          | 1.6%     |
| Parent Decisions             | 1          | 0.8%     |
| Performance Enhancers        | 1          | 0.8%     |
| Regulation                   | 1          | 0.8%     |
| Social Welfare               | 1          | 0.8%     |
| Vaccinations                 | 1          | 0.8%     |

768

769 **Table 3: Methods Used by the Extracted Texts**

| <b>Study Characteristics</b>       | <b>No.</b> | <b>%</b> |
|------------------------------------|------------|----------|
| <i>Study Type</i>                  |            |          |
| Qualitative                        | 14         | 11.2%    |
| Quantitative                       | 103        | 82.4%    |
| Mixed Qualitative and Quantitative | 8          | 6.4%     |
| <i>Data Collection Method</i>      |            |          |
| Survey                             | 70         | 56.0%    |
| Choice Experiment                  | 9          | 7.2%     |
| Qualitative Method                 | 8          | 6.4%     |
| Document/Literature Analysis       | 8          | 6.4%     |
| Mixed Methods                      | 26         | 20.8%    |
| Unspecified                        | 4          | 3.2%     |
| <i>Likert or WTP Study</i>         |            |          |
| Willingness-to-pay Study           | 43         | 34.4%    |
| Likert Scale Study                 | 49         | 39.2%    |

770

771

772 **Table 4: Characteristics of Studies that Measured Level of Concern and Reasons for**  
 773 **Concern**

| <b>Consumer Concern Indicators</b>                                               | <b>No.</b> | <b>%</b> |
|----------------------------------------------------------------------------------|------------|----------|
| <i>Level of consumer concern for all 110 texts</i>                               |            |          |
| Concerned                                                                        | 82         | 65.6%    |
| Mixed Concern                                                                    | 14         | 11.2%    |
| Not Concerned                                                                    | 10         | 8.0%     |
| Study Did Not Measure Concern                                                    | 19         | 15.2%    |
| <i>Reason for consumer concern from the 37 studies included in this analysis</i> |            |          |
| Safety                                                                           | 9          | 24.3%    |
| Human Health and Residues                                                        | 10         | 27.0%    |
| Human Health and Resistance                                                      | 3          | 8.1%     |
| Animal Welfare and Human Health                                                  | 1          | 2.7%     |
| Animal Welfare, Human Health and Antimicrobial Resistance                        | 2          | 5.4%     |
| Animal Welfare                                                                   | 8          | 21.6%    |
| Animal Welfare and Resistance                                                    | 1          | 2.7%     |
| Production Practices                                                             | 2          | 5.4%     |
| Social Responsibility                                                            | 1          | 2.7%     |

774

775

776  
777  
778

**Table 5: Summary of findings from studies that gauged the types of consumers concerned about antibiotic use.**

| Type of Characteristic     | No. | Specific concern variables                                                                     | "Not concerned" variables | Example Paper         |
|----------------------------|-----|------------------------------------------------------------------------------------------------|---------------------------|-----------------------|
| Gender                     | 13  | female (10); males; both (situation dependent)                                                 | Males(2)                  | Widmar 2017           |
| Age                        | 9   | over 65, over 70, older (4), younger, old/young (situation dependent)                          | young                     | Yuxiang 2019          |
| Income                     | 10  | higher income (8), lower income                                                                | higher income             | Wolf et al. 2016      |
| Education                  | 6   | university degree, more educated (3)                                                           | more educated(2)          | Steiner and Yang 2010 |
| Eating and Shopping habits | 4   | meat eaters, pork buying habits, shops at farmer's markets, household shopper                  | none                      | Bergstra et al. 2017  |
| Level of trust             | 3   | high trust, low trust (2)                                                                      | none                      | Muringai 2016         |
| Knowledge and awareness    | 3   | label readers, "health mavens", production knowledge                                           | none                      | Smith et al. 2017     |
| Work                       | 3   | "housewives", union members, employed                                                          | none                      | Connor et al. 2008    |
| Political views            | 3   | socially aware, conservatives, social liberals                                                 | none                      | Ubilave et al. 2010   |
| Ethical views              | 3   | altruistic people, Individualizing moral foundation, believe that "organic" is better for cows | none                      | Lusk et al. 2007      |
| Religion                   | 3   | Protestants, Atheists, religiosity                                                             | none                      | Bergstra et al. 2017  |
| Race                       | 3   | non-white, Black, white                                                                        | none                      | Steiner and Yang 2010 |
| Location                   | 2   | Montana, Quebec                                                                                | none                      | Veeman and Lee 2007   |
| Family structure           | 1   | parents with children under 6                                                                  | none                      | Tong 2011             |

779 "N" is the total number of times the variable category was found to be significant across all  
780 papers. In sum, 52 variables across 30 different studies were found.

781  
782  
783

784

## Figure Captions

785 **Figure 1:** Scoping Methodology (attached)

786

787

788 **Figure 2:** Tally of studies by food studied, method used, and level of concern about antibiotics that the  
789 study found. Excludes studies that did not explicitly gauge a level of concern about antibiotics and  
790 studies that did not specify the product. Each dot is one study.

791

792

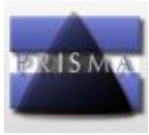

## PRISMA 2009 Flow Diagram

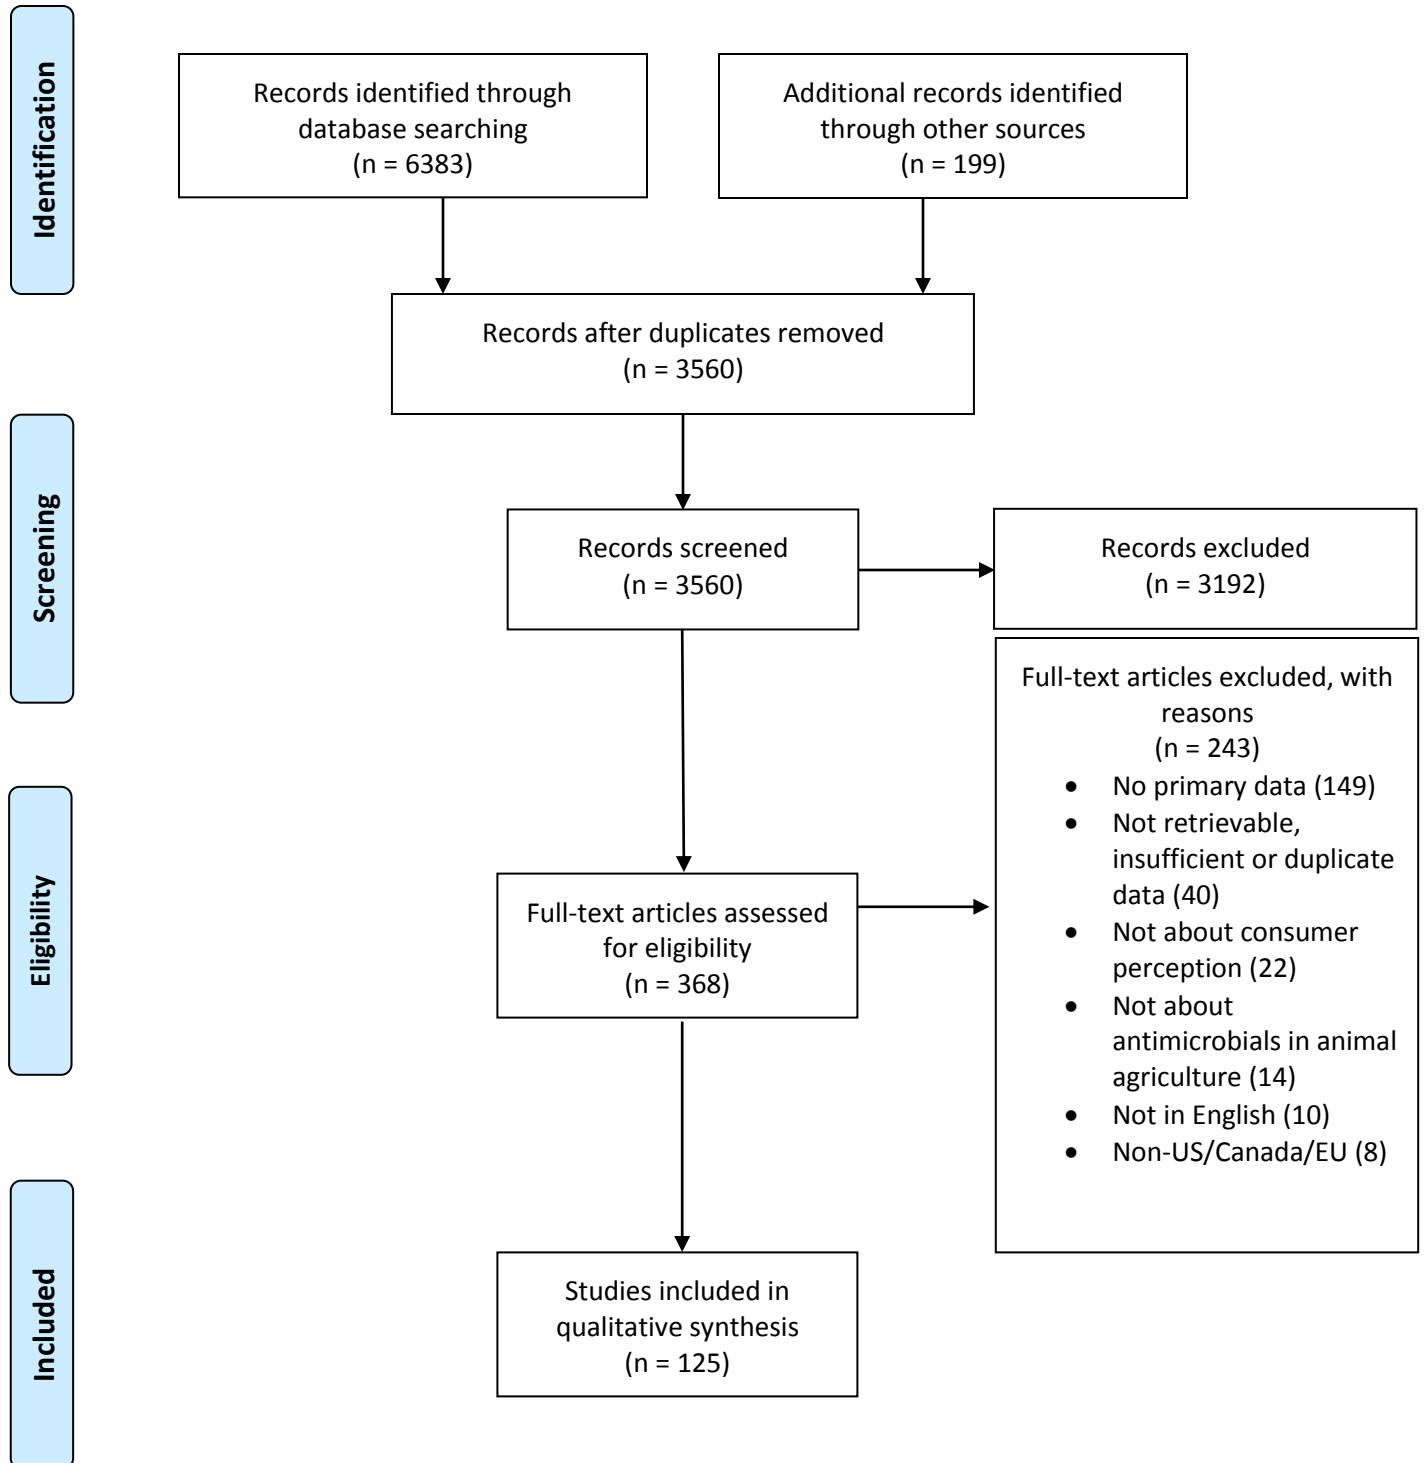

From: Moher D, Liberati A, Tetzlaff J, Altman DG, The PRISMA Group (2009). Preferred Reporting Items for Systematic Reviews and Meta-Analyses: The PRISMA Statement. PLoS Med 6(7): e1000097. doi:10.1371/journal.pmed1000097

For more information, visit [www.prisma-statement.org](http://www.prisma-statement.org).

|                          | WTP                | Likert                     | Qualitative | Total               |
|--------------------------|--------------------|----------------------------|-------------|---------------------|
| <b>Beef</b>              | ∅<br>●●●●●●<br>⊙   | ●●●●<br>⊙                  | ●           | ∅ 1<br>● 8<br>⊙ 2   |
| <b>Pork</b>              | ●●●●●●●<br>●<br>⊙  | ●●●●●●●<br>●●●●<br>⊙       | ●           | ● 15<br>⊙ 2         |
| <b>Poultry</b>           | ●●●                | ∅<br>●●●                   | ●●<br>⊙     | ∅ 1<br>● 8<br>⊙ 1   |
| <b>Dairy</b>             | ∅<br>●●●●          | ∅<br>●●●<br>⊙              |             | ∅ 2<br>● 7<br>⊙ 1   |
| <b>Seafood</b>           | ●●                 | ●                          |             | ● 3                 |
| <b>Multiple Products</b> | ●●●<br>⊙⊙          | ∅<br>●●●●●●<br>⊙⊙          | ⊙           | ∅ 1<br>● 8<br>⊙ 5   |
| <b>Generic "meat"</b>    | ∅<br>●●●●●●<br>●●  | ∅∅∅<br>●●●●●●<br>●●●●<br>⊙ | ●●          | ∅ 4<br>● 18<br>⊙ 1  |
| <b>Total</b>             | ∅ 3<br>● 30<br>⊙ 4 | ∅ 6<br>● 32<br>⊙ 6         | ● 5<br>⊙ 2  | ∅ 9<br>● 67<br>⊙ 12 |

∅ = study found no concern

● = study found concern

⊙ = study found mixed concern





Click here to access/download

**Supporting Information**

Supporting doc 1 Bibliography of Final  
Texts\_Update.docx

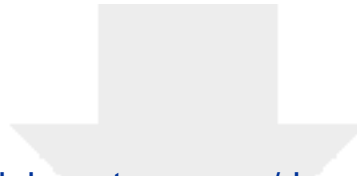

[Click here to access/download](#)

**Supporting Information**

[Supporting Document 2 Scoping Checklist\\_Update.docx](#)

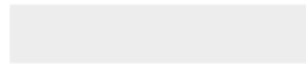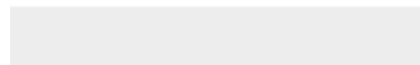

Supplement: pone.0261010.s003.pdf [file pone.0261010.s003.pdf]
